# Supplementary material for: Evaluation of Respiratory, Genotoxic and Cytotoxic Effects from Occupational Exposure to Typography Activities
Source: MDPI journal article supplement (doi:10.3390/atmos14030562), 2023-03-15
Supplement: s1 [file s1]

# Evaluation of Respiratory, Genotoxic and Cytotoxic Effects from Occupational Exposure to Typography Activities

Diana Linhares <sup>1,\*</sup>, Joana Rocha <sup>2</sup>, Armindo Rodrigues <sup>1,2</sup>, Ricardo Camarinho <sup>1</sup> and Patrícia Garcia <sup>2,3</sup>

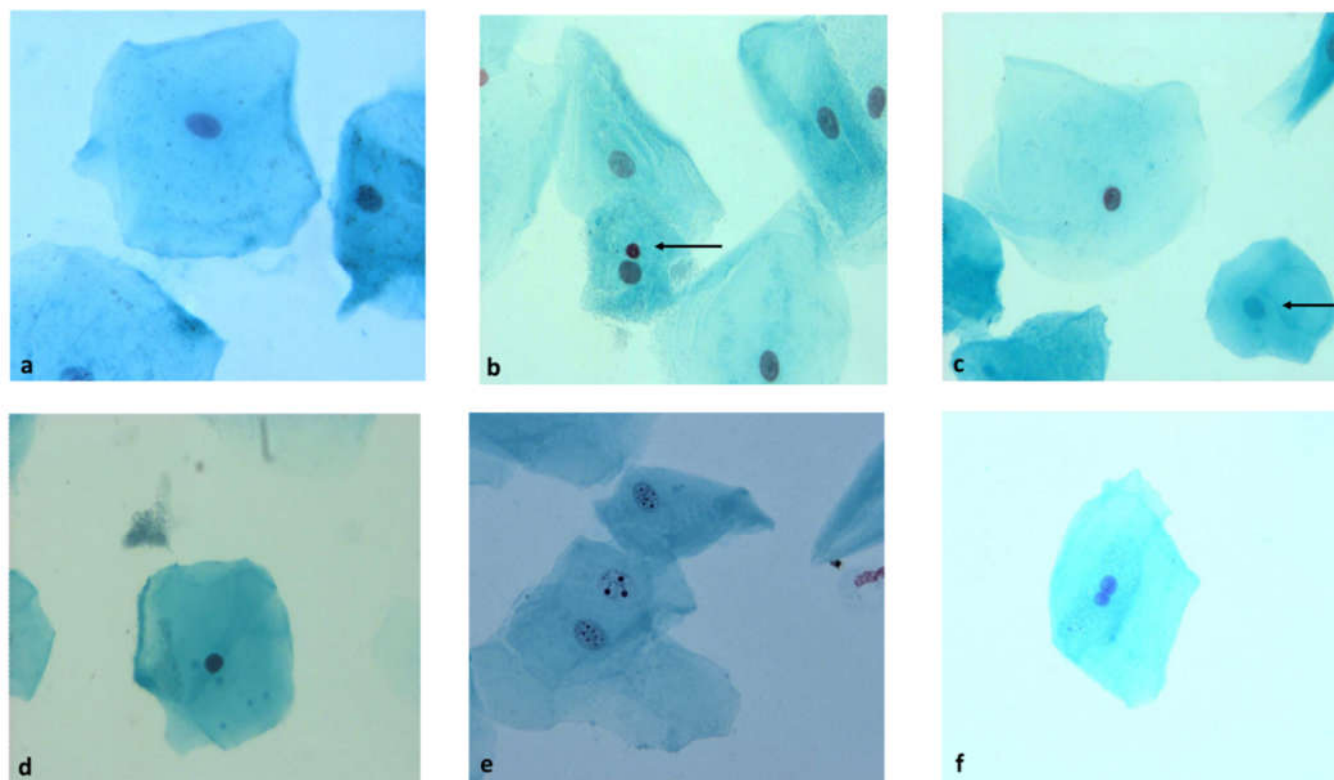

**Figure S1.** Representative photomicrographs of the epithelial cells stained with Feulgen (buccal micronucleus cytome assay): [a] differentiated cell, [b] differentiated cell with micronucleus (arrow), [c] karyolytic cell (arrow), [d] pyknotic cell, [e] karyorrhectic cell, [f] binucleated cell. Magnification of 400X.
